# Supplementary material for: Fidelity of RNA templated end-joining by chlorella virus DNA ligase and a novel iLock assay with improved direct RNA detection accuracy
Source: PubMed Central journal article supplement — Nucleic Acids Res. 2017 Aug 11;45(18):e161. doi: 10.1093/nar/gkx708 (PMC5737725; doi:10.1093/nar/gkx708), 2017-08-11
Supplement: gkx708_supp.pdf [file gkx708_supp.pdf]

## Optimisation of the let-7a iLock invader junction position

PBCV-1 DNA ligase failed to differentiate between closely related miRNAs (figure 6B). To establish Lock assay in this context, we designed iLocks for four *let-7* family isoforms (supplementary table 2). Using iLocks with symmetrical miRNA binding arms, *let-7f* and *let-7d* were specifically differentiated while *let-7a* miRNA was detected with 83 % specificity (supplementary figure S1), also generating 35 % background on *let-7e* miRNA. To see if the *let-7a* fidelity can be increased at higher temperatures, we incubated let-7 iLocks on *let-7e* miRNA in the 48 – 56 °C temperature range. According to our observations, there was no improvement in the specificity at higher temperatures; in fact, less signal was generated at 56 °C compared to lower temperatures (supplementary figure S2). We speculate that relatively low specificity of the let-7a probe on *let-7e* is probably due to two consecutive Gs', downstream of the -3 nucleotide mismatch. As a result, A/G mismatch (3 nucleotides upstream from a *let-7* central base) does not effectively hinder the formation of the invader structure that permits probe activation and misligation. To study how repositioning of the invader junction can influence the *let-7a/e* recognition, we designed new let-7a iLocks with the invader junction located at -3, -2, and -1 nucleotides upstream of the central base (called -3/-2/-1 respectively, supplementary figure S3). Considering the highest background for *let-7e* miRNA, we assessed fidelity of new let-7a iLock probes electrophoretically on the *let-7e* miRNA (supplementary figure S3). Misligation products were observed for the standard let-7a and let-7a -1 iLock, possibly due to the fact that *let-7e* mismatch did not hamper the invader structure formation. In let-7a -3 iLock, the invader junction was shifted 3 nucleotides upstream and positioned precisely over a -3 nucleotide mismatch in the *let-7e* miRNA. No background signal was seen on *let-7e* miRNA.

**Supplementary table 1.** Oligonucleotide sequences used in PBCV-1 DNA ligase genotyping fidelity

| Name            | 5' modification | Sequence (5'-3')                                                       |
|-----------------|-----------------|------------------------------------------------------------------------|
| benchm_temp1_C* |                 | UCUCGCUGUCAUcCCUAUAUCCUCG                                              |
| benchm_temp1_A* |                 | UCUCGCUGUCAUaCCUAUAUCCUCG                                              |
| benchm_temp1_G* |                 | UCUCGCUGUCAUgCCUAUAUCCUCG                                              |
| benchm_temp1_U* |                 | UCUCGCUGUCAUuCCUAUAUCCUCG                                              |
| 3'T_PLP         | Phos            | ATGACAGCGAGA(10A)AGTAGCCGTGACTATCGACT(10A)CGAGGATATAGGT                |
| 3'G_PLP         | Phos            | ATGACAGCGAGA(10A)AGTAGCCGTGACTATCGACT(10A)CGAGGATATAGGG                |
| 3'A_PLP         | Phos            | ATGACAGCGAGA(10A)AGTAGCCGTGACTATCGACT(10A)CGAGGATATAGGA                |
| 3'C_PLP         | Phos            | ATGACAGCGAGA(10A)AGTAGCCGTGACTATCGACT(10A)CGAGGATATAGGC                |
| 5'T_PLP         | Phos            | TATGACAGCGAGA(10A)AGTAGCCGTGACTATCGACT(10A)CGAGGATATAGG                |
| 5'G_PLP         | Phos            | GATGACAGCGAGA(10A)AGTAGCCGTGACTATCGACT(10A)CGAGGATATAGG                |
| 5'A_PLP         | Phos            | AATGACAGCGAGA(10A)AGTAGCCGTGACTATCGACT(10A)CGAGGATATAGG                |
| 5'C_PLP         | Phos            | CATGACAGCGAGA(10A)AGTAGCCGTGACTATCGACT(10A)CGAGGATATAGG                |
| 3'T_iLock       |                 | TATATCCCTATATTATGACAGCGAGA(10A)AGTAGCCGTGACTATCGACT(10A)CGAGGATATAGGT  |
| 3'G_iLock       |                 | TATATCCCTATATGATGACAGCGAGA(10A)AGTAGCCGTGACTATCGACT(10A)CGAGGATATAGGG  |
| 3'A_iLock       |                 | TATATCCCTATATAATGACAGCGAGA(10A)AGTAGCCGTGACTATCGACT(10A)CGAGGATATAGGA  |
| 3'C_iLock       |                 | TATATCCCTATATCATGACAGCGAGA(10A)AGTAGCCGTGACTATCGACT(10A)CGAGGATATAGGC  |
| 5'T_iLock       |                 | TATATCCCTATATGTTATGACAGCGAGA(10A)AGTAGCCGTGACTATCGACT(10A)CGAGGATATAGG |
| 5'G_iLock       |                 | TATATCCCTATATGGATGACAGCGAGA(10A)AGTAGCCGTGACTATCGACT(10A)CGAGGATATAGG  |
| 5'A_iLock       |                 | TATATCCCTATATGAAATGACAGCGAGA(10A)AGTAGCCGTGACTATCGACT(10A)CGAGGATATAGG |
| 5'C_iLock       |                 | TATATCCCTATATGCGATGACAGCGAGA(10A)AGTAGCCGTGACTATCGACT(10A)CGAGGATATAGG |

Decorator probe      Cy3      **AGTAGCCGTGACTATCGACT<sup>a</sup>**

\*: RNA oligonucleotides; lowercase: centrally located polymorphic site; (10A): linker; **bolded, underlined**: nucleotides participating in Invader structure formation; <sup>a</sup>: last four bases of the decorator probe were 2' O-methylRNA to prevent oligo hydrolysis by Phi29 polymerase.

**Supplementary table 2.** Oligonucleotide sequences used in miRNA detection

| Name           | 5' modification | Sequence (5'- 3')                                                                                  |
|----------------|-----------------|----------------------------------------------------------------------------------------------------|
| hsa_let-7a*    |                 | UGAGGUAGUAGGUUGUAUAGUU                                                                             |
| hsa_let-7f*    |                 | UGAGGUAGUAGaUUGUAUAGUU                                                                             |
| hsa_let-7e*    |                 | UGAGGUAGgAGGUUGUAUAGUU                                                                             |
| hsa_let-7d*    |                 | aGAGGUAGUAGGUUGcAUAGUU                                                                             |
| let-7a_PLP     | Phos            | CTACTACCTCA(7A) <b>CCTCAATGCACATGTTTGGCTCC(7A)</b> AACTATAACAAC                                    |
| let-7f_PLP     | Phos            | CTACTACCTCA(7A) <b>CCTCAATGCACATGTTTGGCTCC(7A)</b> AACTATACAAt                                     |
| let-7e_PLP     | Phos            | CTcCTACCTCA (7A) <b>CCTCAATGCACATGTTTGGCTCC(7A)</b> AACTATAACAAC                                   |
| let-7d_PLP     | Phos            | CTACTACCTct (7A) <b>CCTCAATGCACATGTTTGGCTCC(7A)</b> AACTATgCAAC                                    |
| let-7a_iLock   |                 | CGCGTGTCTGTTG <b>C</b> CTACTACCTCA(10A) <b>CCTCAATGCACATGTTTGGCTCC(10A)</b> AACTATA <b>CAAC</b>    |
| let-7a-3_iLock |                 | CGCGATGCGATAC <b>A</b> CTACTACCTCA(10A) <b>CCTCAATGCACATGTTTGGCTCC(10A)</b> AACTATA <b>CAACCTA</b> |
| let-7f_iLock   |                 | CGCGTGTCTGTTG <b>C</b> CTACTACCTCA(10A) <b>CCTCAATGCACATGTTTGGCTCC(10A)</b> AACTATA <b>CAAT</b>    |
| let-7e_iLock   |                 | CGCGTGTCTGTTG <b>C</b> CTCCTACCTCA(10A) <b>CCTCAATGCACATGTTTGGCTCC(10A)</b> AACTATA <b>CAAC</b>    |
| let-7d_iLock   |                 | CGCGTGTCTGTTG <b>C</b> CTACTACCTCT(10A) <b>CCTCAATGCACATGTTTGGCTCC(10A)</b> AACTAT <b>GCAAC</b>    |
| Decorator      | Cy3             | <b>CCTCAATGCACATGTTTGGCTCC<sup>a</sup></b>                                                         |

\*: RNA oligonucleotides; lowercase: base substitutions in reference to the let-7a sequence; **bolded, underlined**: nucleotides participating in invader structure formation; <sup>a</sup>: last four bases of the decorator probe were 2' O-methylRNA to prevent oligo hydrolysis by Phi29 polymerase.

**Supplementary table 3.** Oligonucleotide sequences used in KRAS genotyping

| Name            | 5' modification | Sequence (5'- 3')                                                                                     |
|-----------------|-----------------|-------------------------------------------------------------------------------------------------------|
| hsa_KRASwt*     |                 | AACUUGUGGUAGUUGGAGCU <b>gGU</b> GGCGUAGGCAAGAGUGCC                                                    |
| KRASwt_PLP      | Phos            | AGCTCCA <b>A</b> CTACCAC(10A)AGTAGCCGTGACTATCGACT(10A)CTTGCCTACGCCACC                                 |
| KRAS_aGT_PLP    | Phos            | AGCTCCA <b>A</b> CTACCAC(10A)AGTAGCCGTGACTATCGACT(10A)CTTGCCTACGCCACT                                 |
| KRAS_tGT_PLP    | Phos            | AGCTCCA <b>A</b> CTACCAC(10A)AGTAGCCGTGACTATCGACT(10A)CTTGCCTACGCCACA                                 |
| KRAS_cGT_PLP    | Phos            | AGCTCCA <b>A</b> CTACCAC(10A)AGTAGCCGTGACTATCGACT(10A)CTTGCCTACGCCACG                                 |
| KRASwt_iLock    |                 | TATATCCCTATAT <b>C</b> AGCTCCA <b>A</b> CTACCAC(10A)AGTAGCCGTGACTATCGACT(10A)CTTGCCTACGCCACC          |
| KRAS_aGT_iLock  |                 | TATATCCCTATAT <b>T</b> AGCTCCA <b>A</b> CTACCAC(10A)AGTAGCCGTGACTATCGACT(10A)CTTGCCTACGCCAC <b>I</b>  |
| KRAS_tGT_iLock  |                 | TATATCCCTATAT <b>A</b> AGCTCCA <b>A</b> CTACCAC(10A)AGTAGCCGTGACTATCGACT(10A)CTTGCCTACGCCACA <b>A</b> |
| KRAS_cGT_iLock  |                 | TATATCCCTATAT <b>G</b> AGCTCCA <b>A</b> CTACCAC(10A)AGTAGCCGTGACTATCGACT(10A)CTTGCCTACGCCAC <b>G</b>  |
| Decorator probe | Cy3             | <b>CCTCAATGCACATGTTTGGCTCC<sup>a</sup></b>                                                            |

\*: RNA oligonucleotides; **highlighted**: codon 12; lowercase: position 34, genotyped in KRAS mRNA; **bolded, underlined**: nucleotides participating in invader structure formation; <sup>a</sup>: last four bases of the decorator probe were 2' O-methylRNA to prevent oligo hydrolysis by Phi29 polymerase.

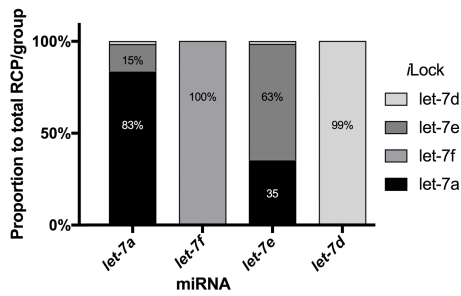

**Supplementary figure S1. Detection of *let-7* miRNA family members using iLocks with symmetrical arms.** For each iLock group, average number of RCPs was added and each iLock fidelity is presented as a percentage. Average number of RCPs in negative controls was subtracted from the total RCP counts.

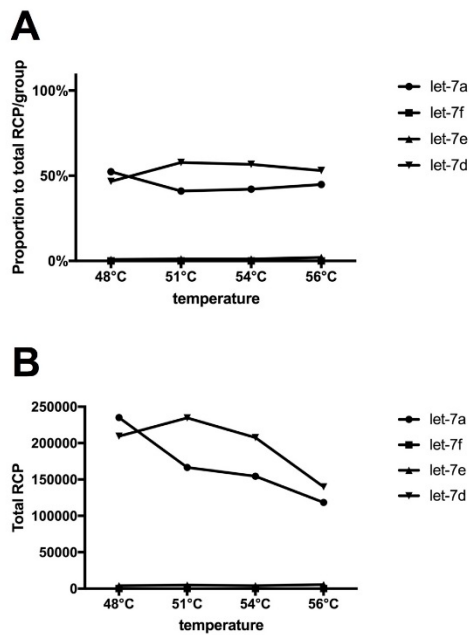

**Supplementary figure S2. iLock miRNA detection assay optimisation.** *let-7a* miRNA detection using all four iLocks in a 48 – 56 °C range; specificity (A) and assay efficiency (B). The average RCP number from negative samples (no template control) was subtracted from probe values. Error bars  $\pm$  s.d.; n=2.

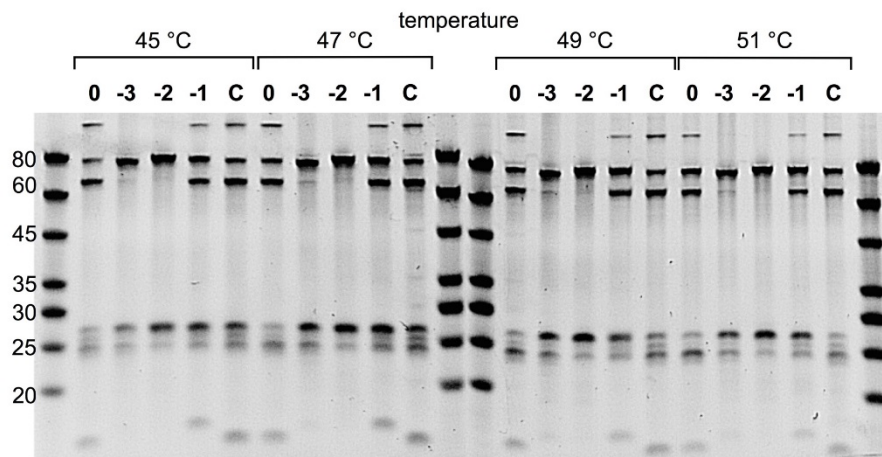

**Supplementary figure S3. Analysis of the various *let-7a* iLocks and *let-7e* iLock on *let-7e* miRNA by PAGE.** iLocks were activated in a 48 – 56 °C range and ligated using PBCV-1 DNA ligase. 0: traditional *let-7a* iLock with symmetrical miRNA binding arms; - n: positioning of the invader junction was shifted upstream by “n” nucleotides; C: control *let-7e* iLock.

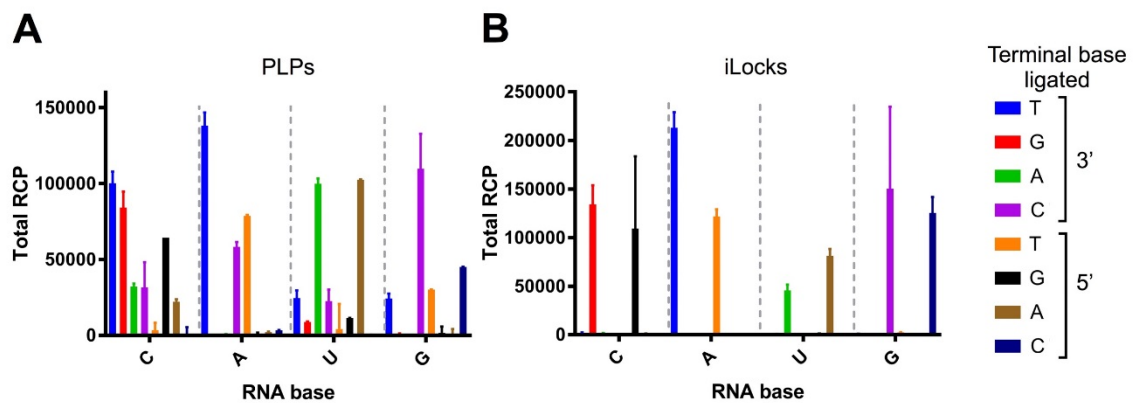

**Supplementary figure S4. PBCV-1 DNA ligase end joining fidelity with 3' and 5' mismatches.** PBCV-1 DNA ligase specificity profiles using PLPs (A, figure 2) and iLocks (A, figure 5B) were created by adding the average number of RCPs for each PLP/iLock on one of four RNA templates and presenting the respective probe as a percentage within a group. The y-axis shows the number of RCPs and the x-axis, the polymorphic base in RNA target. The average RCP number from negative samples (no template control) was subtracted from probe values. Error bars  $\pm$  s.d.; n=2.

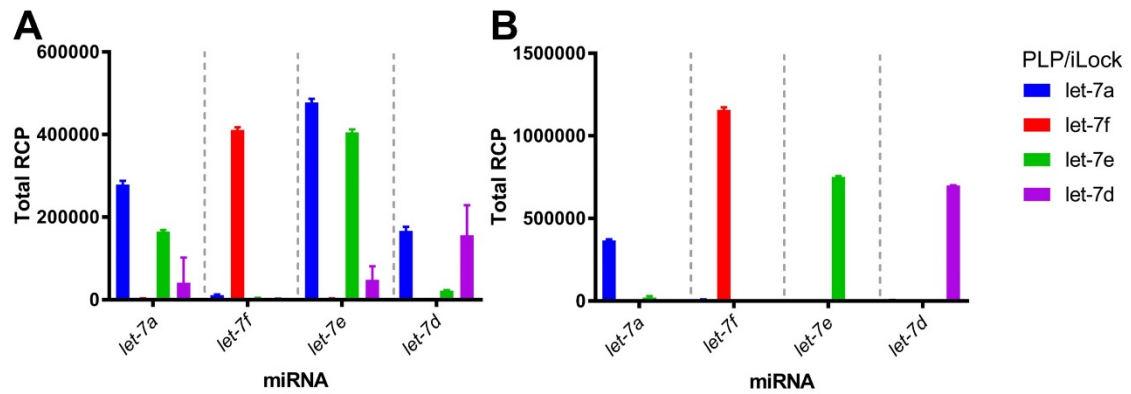

**Supplementary figure S5. *let-7a* detection using PLP/iLock assays.** *let-7* miRNA detection using PLPs (A, figure 6B) and iLock assay (B). The y-axis shows the number of RCPs and the x-axis, the miRNA template. The average RCP number from negative samples (no miRNA control) was subtracted from probe average RCP count values. Error bars  $\pm$  s.d.; n=2.

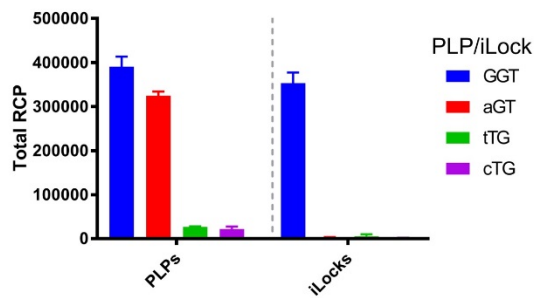

**Supplementary figure S6. *KRAS* codon 12 genotyping using PLP and iLock assays.** The y-axis shows the number of RCPs. Four SNPs (depicted as lowercase nucleotides in the key) were detected in *KRAS* wild type GGT codon 12 with PLPs (left part) and iLocks (right). The average RCP number from negative samples (no template control) was subtracted from probe values. Error bars  $\pm$  s.d.; n=2.

**Supplementary table 4.** Oligonucleotide sequences used in Invader-PCR experiment

| Name            | Sequence (5'- 3')                                      |
|-----------------|--------------------------------------------------------|
| benchm_templ_A* | UCUCGCUGUCAU <u>ACC</u> UAU <u>UCC</u> UCG             |
| INV_PCR_3'      | <u>TGCGGACACGAATACCAGACCGAGGATATAGGT</u>               |
| INV_PCR_5'      | tatatccctatat <u>TATGACAGCGAGATATGGGATACGACGCCCGAT</u> |
| PCR_R           | CGGGCGTCGTATCCCAT                                      |
| PCR_L           | GCGGACACGAATACCAGAC                                    |

\*: RNA oligonucleotides; lowercase: flap; **bolded, underlined**: nucleotides participating in invader structure formation; underlined: PCR primer binding sites

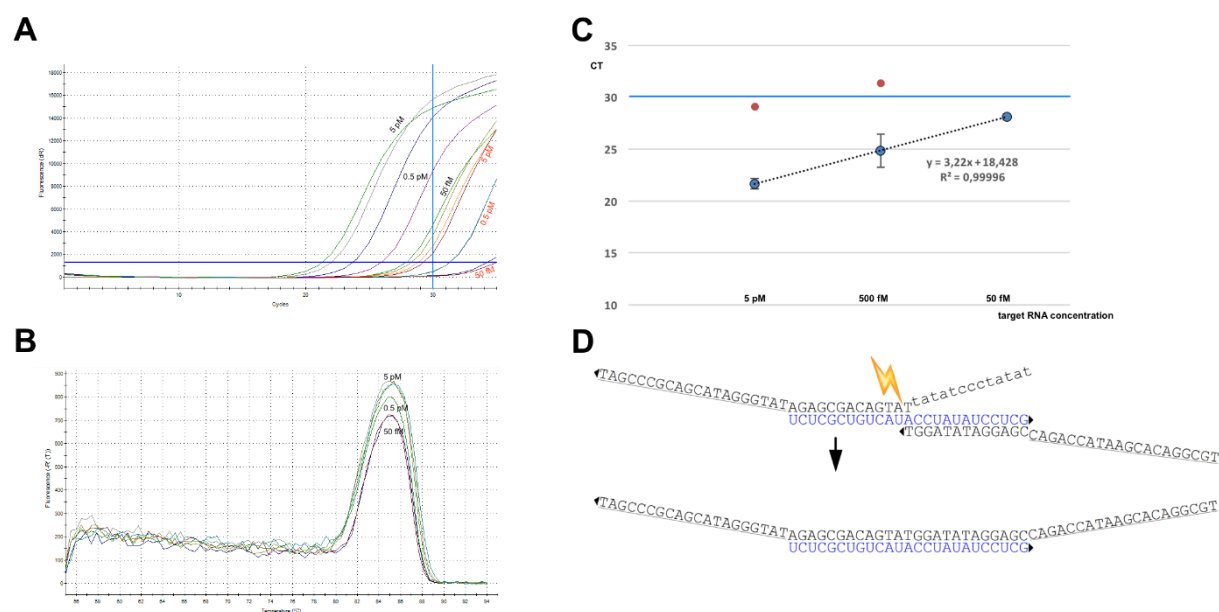

**Supplementary figure S7. Combination of Invader cleavage, RNA templated DNA ligation and exponential PCR.** A: Amplification curves of the dilution series, including negative controls where Taq DNA polymerase was omitted during the probe-activation step (plots labelled in red). Ct of 30 is indicated with a blue, vertical line. Each dilution was assayed in duplicates. B: Melting curve of the dilution series. C: A standard curve was generated using a 10-fold dilution of a template Ct is plotted against the starting quantity of template for each dilution. Blue points: dilution series; red point: Taq- negative control. The equation for the regression line and the R-value are shown in the graph. Ct of 30 is indicated with a blue, horizontal line. D: Schematics of RNA templated probe activation, followed by ligation and PCR. Blue: RNA template; Underlined: primer hybridisation sites. Cleavage position is indicated with a spark. Template negative and ligase negative controls could not record any Ct value. The calculated amplification efficiency for dilution series was 104.4%.
